# Supplementary material for: Combined in vivo and in situ genome-resolved metagenomics reveals novel symbiotic nitrogen fixing interactions between non-cyanobacterial diazotrophs and microalgae
Source: Research Square preprint supplement (doi:10.21203/rs.3.rs-2361194/v1), 2023-01-12
Supplement: Supplementary file 1 [file 37f24d29ad1fe2799ecc0aa3.xlsx]

## Sheet: Pt15 MAGs
Completeness, contamination, strain heterogeneity, N50 (bp) and GC (%) of all the assembled MAGs/genomes from Pt15
Genus	Species	MAG No.	Phylum	Class	Order	Family	Completeness (%)	Contamination (%)	Strain heterogeneity	N50 (bp)	GC (%)
Phyllobacterium	Phyllobacterium sp900539805	MAG2	Proteobacteria	Alphaproteobacteria	Rhizobiales_A	Rhizobiaceae_A	99.94	0.00	0.00	714.949	59.3
Mesorhizobium		MAG3	Proteobacteria	Alphaproteobacteria	Rhizobiales	Rhizobiaceae	98.64	1.16	50.00	181.333	63.0
Sphingopyxix		MAG5	Proteobacteria	Alphaproteobacteria	Sphingomonadales	Sphingomonadaceae	97.63	1.54	0.00	142.08	63.7
Sphingomonas	Sphingomonas sp003355005	MAG6	Proteobacteria	Alphaproteobacteria	Sphingomonadales	Sphingomonadaceae	99.66	0.85	0.00	334.03	68.1
Sphingopyxix		MAG7	Proteobacteria	Alphaproteobacteria	Sphingomonadales	Sphingomonadaceae	99.98	2.41	0.00	645.977	64.9
Bradyrhizobium	Bradyrhizobium sp003020075	MAG8	Proteobacteria	Alphaproteobacteria	Rhizobiales	Xanthobacteraceae	97.51	1.28	33.33	132.484	64.7
Brevundimonas	Brevundimonas sp006515835	MAG9	Proteobacteria	Alphaproteobacteria	Caulobacterales	Caulobacteraceae	88.62	1.62	16.67	6.024	67.6
Bradyrhizobium	Bradyrhizobium sp000015165	MAG21	Proteobacteria	Alphaproteobacteria	Rhizobiales	Xanthobacteraceae	88.86	3.27	8.00	3.39603	64.8
Kocuria		MAG19	Proteobacteria	Actinomycetia	Micrococcales	Micrococcaceae	99.77	0.77	25.00	281.77	64.9
Georhizobium	Georhizobium sp902498825	MAG13	Proteobacteria	Alphaproteobacteria	Rhizobiales	Rhizobiaceae	100.00	0.00	0.00	1.05242	61.9
Arthrobacter		MAG14	Actinobacteriota	Actinomycetia	Actinomycetales	Micrococcaceae	99.71	0.00	0.00	576.94	69.1

## Sheet: Other microalgae MAGs
Completeness, contamination, strain heterogeneity, N50 (bp) and GC (%) of all the assembled MAGs/genomes from other algaes
Genus/Species	MAG No.	Phylum	Class	Order	Family	Completeness (%)	Contamination (%)	Strain heterogeneity (%)	N50	GC (%)
Thalassospira	MAG12	Proteobacteria	Alphaproteobacteria	Rhodospirillales	Thalassospiraceae	100.00	0.00	0.00	1.12895	53.4
Thalassospira	MAG15	Proteobacteria	Alphaproteobacteria	Rhodospirillales	Thalassospiraceae	100.00	0.00	0.00	1.24203	53.7
Rhodococcus	MAG16	Actinobacteriota	Actinomycetia	Mycobacteriales	Mycobacteriaceae	99.94	0.10	0.00	521.402	62.5
Stappia	MAG17	Pseudomonadota	Alphaproteobacteria	Hyphomicrobiales	Stappiaceae	87.98	1.02	0.00	8.887	67.4
Stenotrophomonas maltophilia	MAG20	Pseudomonadota	Gammaproteobacteria	Xanthomonadales	Xanthomonadaceae	98.59	0.73	0.00	123.771	69.2

## Sheet: Predicted plamsids
Plasmids generated by SCAPP in MetaG_Pt15
Plasmid name	Plasmid length	Species
Plasmid_1_length	26139	Brevundimonas subvibrioides ATCC 15264
Plasmid_2_length	10636	Sphingobium yanoikuyae
Plasmid_3_length	6260	Bradyrhizobium sp.PSBB068
Plasmid_4_length	5391	Sphingobium sp. TKS
Plasmid_5_length	103984	Sphingomonas sp.AAP5
Plasmid_6_length	139599	Sphingomonas sp.FARSPH
Plasmid_7_length	467094	Georhizobium profundi
Plasmid_8_length	26309	Sphingomonas sp.FARSPH
total length of plasmids : 785412 number of plasmid : 8 average length : 98176.5
total length of plasmids : 785412
number of plasmid : 8
average length : 98176.5
Plasmids generated by metaplasmidSPAdes in MetaG_Pt15
Plasmid name	Plasmid length	Species
Plasmid_1_length	128427	Sphingomonas melonis TY
Plasmid_2_length	97205	Sphingopyxis sp.PAMC25046
Plasmid_3_length	107189	Brevundimonas sp.'scallop'
Plasmid_4_length	106239	Sphingopyxis granuli
Plasmid_5_length	41564	Arthrobacter phage Popper
Plasmid_6_length	16542	Rhizorhabdus wittichii DC-6
Plasmid_7_length	10763	Sphingobium yanoikuyae
Plasmid_8_length	5517	Comamonas testosteroni
Plasmid_9_length	26496	Croceicoccus marinus
Plasmid_10_length	220065	Mesorhizobium sp.WSM1497
Plasmid_11_length	16492	Sphingomonas sp.DS-9
Plasmid_12_length	10906	Solimonas sp.K1W22B-7
Plasmid_13_length	5518	Sphingobium sp.TKS
Plasmid_14_length	4409	Rhizobium leguminosarum bv.trifolii
total length of plasmids : 797332 number of plasmid : 14 average length : 56952.86
Plasmids generated by PlaScope in MetaG_Pt15
Plasmid name	Plasmid length	Species
Plasmid_1_length	1282024	Georhizobium profundi
Plasmid_2_length	359260	Sphingomonas sp.FARSPH
Plasmid_3_length	291359	Sphingopyxis sp.BSN-002
Plasmid_4_length	193392	Sphingomonas sp.FARSPH
Plasmid_5_length	137521	Sphingobium amiense
Plasmid_6_length	34719	Bradyrhizobium sp. BTAi1
Plasmid_7_length	28016	Shinella zoogloeoides
Plasmid_8_length	22955	Cupriavidus metallidurans
Plasmid_9_length	19242	Diaphorobacter sp.JS3050
Plasmid_10_length	12496	Sphingopyxis macrogoltabida
Plasmid_11_length	2921	Cupriavidus metallidurans
Plasmid_12_length	2764	Solimonas sp. K1W22B-7
Plasmid_13_length	1552	Pseudoxanthomonas mexicana
Plasmid_14_length	1532	Solimonas sp. K1W22B-7
Plasmid_15_length	1337	Aeromonas hydrophila subsp. Hydrophila
Plasmid_16_length	1220	Stenotrophomonas acidaminiphila
Plasmid_17_length	1104	Acidovorax sp.JS42
Plasmid_18_length	846	Enterobacter cloacae
Plasmid_19_length	534	Diaphorobacter sp. JS3050
total length of plasmids : 2394794 number of plasmid : 19 average length : 126041.79
