# Supplementary material for: Combined in vivo and in situ genome-resolved metagenomics reveals novel symbiotic nitrogen fixing interactions between non-cyanobacterial diazotrophs and microalgae
Source: Research Square preprint supplement (doi:10.21203/rs.3.rs-2361194/v1), 2023-01-12
Supplement: Supplementary file 2 [file a4b461e810d4d7a91d0568e4.xlsx]

## Sheet: Sheet1
Supplementary Table 6. Accessions, name, source, diazotrophy, reference and cluster assignation for genomes selected from Mircoscope for phylogenetic studies
Serial no	Cluster	Corrosponding number in the Phylogeny	Accession	Bacteria	Source	Closest Pt15 MAGs	Closest Diazo TARA MAGs	Diazotroph information				Synomym	Reference
								Symbiotic host	Free-living	Both	No Diazotroph info available
1	A	2	GCA_000420265.1	Oceanicaulis alexandrii DSM 11625	Marine	MAG9 Brevundimonas	1				No Diazotroph info available		Oceanicaulis alexandrii gen. nov., sp. nov., a novel stalked bacterium isolated from a culture of the dinoflagellate Alexandrium tamarense (Lebour) Balech, Draft Genome Sequence for Caulobacter sp. Strain OR37, a Bacterium Tolerant to Heavy Metals.
2	A	4	GCA_000006905.1	Caulobacter crescentus CB15	Aquatic	MAG9 Brevundimonas					No Diazotroph info available		https://www.ncbi.nlm.nih.gov/Taxonomy/Browser/wwwtax.cgi?id=190650
3	A	5	GCA_000372645.1	Caulobacter crescentus OR37	Sub-sediments	MAG9 Brevundimonas					No Diazotroph info available		https://www.ncbi.nlm.nih.gov/Taxonomy/Browser/wwwtax.cgi?id=1292034
4	A	7	LNUW00000000	Agrobacterium sp. Strain R89-1	Terrestrial	MAG4 Georhizobium	6	Papaver somniferum					https://www.researchgate.net/publication/322840953_Agrobacterium_bohemicum_spnov_isolated_from_poppy_seed_wastes_in_central_Bohemia
5	A	8	GCA_000730975.1	Agrobacterium tumefaciens LBA4404	Terrestrial	MAG4 Georhizobium	6	Achillea ptarmica L.					Complete Genome Sequence of Agrobacterium tumefaciens Ach5
6	A	9	GCF_014200295.1	Rhizobium giardinii bv. giardinii H152	Terrestrial	MAG4 Georhizobium	6	Phaseolus vulgaris				Pararhizobium giardinii bv. giardinii H152	https://www.researchgate.net/publication/46220379_Rhizobium_herbae_sp_nov_and_Rhizobium_giardinii-related_bacteria_minor_microsymbionts_of_various_wild_legumes_in_China
7	A	11	GCA_000009625.1	Mesorhizobium loti MAFF303099	Terrestrial	MAG4 Georhizobium, MAG3 Mesorhizobium		Lotus glaber					https://pubmed.ncbi.nlm.nih.gov/19348570/
8	A	12	GCA_000504265.1	Mesorhizobium japonicum R7A	Terrestrial	MAG4 Georhizobium, MAG3 Mesorhizobium		L. corniculatus					https://www.ncbi.nlm.nih.gov/pmc/articles/PMC135072/
9	A	13	GCA_000230995.3	Mesorhizobium australicum WSM2073	Terrestrial	MAG4 Georhizobium, MAG3 Mesorhizobium		Poorly effective in N2 fixation on B. pelecinus					https://www.ncbi.nlm.nih.gov/pmc/articles/PMC4062642/
10	A	14	GCA_000176035.2	Mesorhizobium opportunistum WSM2075	Terrestrial	MAG4 Georhizobium, MAG3 Mesorhizobium		Poorly effective in N2 fixation on B. pelecinus					https://pubmed.ncbi.nlm.nih.gov/24976886/
11	A	15	GCA_001676765.1	Mesorhizobium loti NZP2037	Terrestrial	MAG4 Georhizobium, MAG3 Mesorhizobium		microsymbiont of Lotus pedunculatus					https://www.ncbi.nlm.nih.gov/pmc/articles/PMC4334872/
12	A	16	GCF_001618845.1	Mesorhizobium ciceri biovar biserrulae WSM1271	Terrestrial	MAG4 Georhizobium, MAG3 Mesorhizobium		Biserrula pelecinus L					Mesorhizobium ciceri biovar biserrulae, a novel biovar nodulating the pasture legume Biserrula pelecinus L. Mesorhizobium soli sp. nov., a novel species isolated from the rhizosphere of Robinia pseudoacacia L. in South Korea by using a modified culture method." Antonie van Leeuwenhoek (2015)
13	A	17	CP015062.1	Mesorhizobium ciceri Strain CC1192	Terrestrial	MAG4 Georhizobium, MAG3 Mesorhizobium		Microsymbiont of Cicer arietinum					Complete Genome Sequence of Mesorhizobium ciceri Strain CC1192, an efficient Nitrogen-Fixing Microsymbiont of Cicer arietinum. The genome analysis reveals that A. caulinodans is a diazotroph that acquired the capacity to nodulate most probably through horizontal gene transfer of a complex symbiosis island.
14	A	19	GCA_003012705.1	Mesorhizobium soli	Terrestrial (isolated from Robinia pseudoacacia L.)	MAG3 Mesorhizobium, MAG2 Phyllobacterium			Free-living				Mesorhizobium terrae sp. nov., a novel species isolated from soil in Jangsu, Korea
15	A	20	GCA_000010525.1	Azorhizobium caulinodans ORS 571	Terrestrial	MAG8 Bradyrhizobium	21	Endosymbiont of Sesbania rostrata					The genome of the versatile nitrogen fixer Azorhizobium caulinodans ORS571
16	A	22	LGTB00000000.1	Bradyrhizobium viridifuturi Strain SEMIA 690T	Terrestrial	MAG8 Bradyrhizobium	21	Centrosema pubescens					https://www.ncbi.nlm.nih.gov/pmc/articles/PMC4683235/
17	A	24	GCA_000015165.1	Bradyrhizobium sp. BTAi1	Isolated from aquatic	MAG8 Bradyrhizobium, MAG21 Bradyrhizobium		endosymbiont of Aeschynomene indica, aquatic legume					Bradyrhizobium sp. BTAi1, endosymbiont of Aeschynomene indica. Hirsch, P., and Muller, M. "Blastobacter aggregatus sp. nov., Blastobacter capsulatus sp. nov., and Blastobacter denitrificans sp. nov., new budding bacteria from freshwater habitats." Syst. Appl. Microbiol. (1985) 6:281-286. [No PubMed record available. The Aquatic Budding Bacterium Blastobacter denitrificans Is a Nitrogen-Fixing Sym…
18	A	25	GCA_013179005.1	Bradyrhizobium sp. LMG 8443	Surface lake water	MAG8 Bradyrhizobium, MAG21 Bradyrhizobium							Bradyrhizobium denitrificans 222 is a thermophilic Proteobacterium that was isolated from surface lake water.
19	A	26	GCA_018129525.1	Bradyrhizobium denitrificans SZCCT0094	Fresh water	MAG8 Bradyrhizobium, MAG21 Bradyrhizobium		Aeschynomene indica					Bradyrhizobium denitrificans is a species of a-proteobacteria in the family Nitrobacteraceae.
20	A	27	GCA_000239775.2	Bradyrhizobium sp. ORS 375	Terrestrial	MAG21 Bradyrhizobium							our study
21	A	28	GCA_000344805.1	Bradyrhizobium oligotrophicum S58	Paddy field soil	MAG21 Bradyrhizobium		Aeschynomene indica					Genome Analysis Suggests that the Soil Oligotrophic Bacterium Agromonas oligotrophica (Bradyrhizobium oligotrophicum) Is a Nitrogen-Fixing Symbiont of Aeschynomene indica
22	A	29	GCA_001556485.1	Bradyrhizobium sp. CCH1-B1	Terrestrial	MAG21 Bradyrhizobium	30		Free-living				https://img.jgi.doe.gov/cgi-bin/m/main.cgi?section=TaxonDetail&page=taxonDetail&taxon_oid=2876787635
23	B	31	GCA_000420305.1	Sphingopyxis baekryungensis DSM 16222	Marine	MAG7 Sphingopyxis	34				No Diazotroph info available		https://www.ncbi.nlm.nih.gov/Taxonomy/Browser/wwwtax.cgi?id=1174684
24	B	32	GCA_000013325.1	Novosphingobium aromaticivorans DSM 12444	Marine	MAG7 Sphingopyxis	34				No Diazotroph info available		Complete sequence of Novosphingobium aromaticivorans DSM 12444. Copeland A. et al
25	B	33	GCA_000235975.2	Novosphingobium pentaromativorans US6-1	Marine	MAG7 Sphingopyxis	34				No Diazotroph info available		Novosphingobium pentaromativorans US6-1 is a facultative anaerobe, mesophilic, Gram-negative Proteobacterium that was isolated from muddy sediment.
26	B	35	GCA_000371385.1	Sphingopyxis sp. MC1	Terrestrial	MAG7 Sphingopyxis					No Diazotroph info available		Summary of Sphingopyxis sp. MC1, Strain MC1, version 26.1
27	B	37	GCA_000013985.1	Sphingopyxis alaskensis RB2256	Marine	MAG7 Sphingopyxis, MAG5 Sphingopyxis, MAG6 Sphingomonas					No Diazotroph info available		https://www.ncbi.nlm.nih.gov/Taxonomy/Browser/wwwtax.cgi?id=317655
28	B	38	GCA_000382885.1	Sphingobium japonicum BiD32	Terrestrial	MAG7 Sphingopyxis, MAG5 Sphingopyxis, MAG6 Sphingomonas					No Diazotroph info available		https://www.ncbi.nlm.nih.gov/Taxonomy/Browser/wwwtax.cgi?id=1301087
29	B	39	GCA_002504085.1	Sphingobium yanoikuyae S72	Terrestrial	MAG5 Sphingopyxis, MAG6 Sphingomonas					No Diazotroph info available		Complete Genome Report of Sphingobium Yanoikuyae S72: A Bacterium Capable of Degrading Hydrocarbons
30	B	41	GCA_000016765.1	Sphingomonas wittichii RW1	Marine	MAG5 Sphingopyxis, MAG6 Sphingomonas					No Diazotroph info available		Wittich RM, Wilkes H, Sinnwell V, Francke W, Fortnagel P. Metabolism of dibenzo-p-dioxin by Sphingomonas sp. strain RW1. Appl Environ Microbiol. 1992; 58: 1005–1010. PMCID: PMC195369 [PMC free article] [PubMed] [Google Scholar]
