# Supplementary material for: Combined in vivo and in situ genome-resolved metagenomics reveals novel symbiotic nitrogen fixing interactions between non-cyanobacterial diazotrophs and microalgae
Source: Research Square preprint supplement (doi:10.21203/rs.3.rs-2361194/v1), 2023-01-12
Supplement: Supplementary file 3 [file e1c19d283a3852fb0d6a12f6.docx]

**Supplementary figures legend**

**Supplementary Fig 1. Particulate Organic Nitrogen (PON) measurements**.a, PON kinetic and b, corresponding xenic *Pt15* biomassfor 6 time points over a period of 80 days in nitrate deplete and replete conditions.

**Supplementary Fig 2.** a,Agarose gel picture of PCR amplified products. a, amplification of *nifH* gene in isolated bacteria using degenerate primers. 1, *Stenotrophomonas maltophilia* MAG20, 2, *Stappia* MAG17, 3, *Bradyrhizobium* sp. (MAG 8), 4, *Bradyrhizobium* sp. (MAG 21). Positive control (PC) *Azotobacter vinelandii,* Negative control (NC). Panel b, represents MAG21 differentiating primers, amplifying gene specific to 5, *Bradyrhizobium* sp. (MAG 21) and not 6, *Bradyrhizobium* sp. (MAG 8). Panel c, d represent *Sphingopyxis sp.* (MAG 7) and Panel c, d represent *Sphingopyxis sp.* (MAG 5) specific primers, indicating amplification of *Sphingopyxis sp.* (MAG 7) gene for sample 7, *Sphingopyxis sp.* (MAG 7).

**Supplementary Fig 3.** Phylogenomic tree representing clusters C, D and E MAGs from *Pt15* andother microalgae with 1888 TARA ocean bacterial MAGs.

**Supplementary Fig 4. MAGs relative abundance in function of environmental parameters.** Are shown respectively *Mesorhizobium* MAG3 (a and c) and *Bradyrhizobium* MAG8 (b and d) relative abundances in function of iron and oxygen.

**Supplementary File 1.** Media recipes used for isolation of bacteria from *Phaeodactylum tricornutum* and other microalgae.

**Supplementary Table 1.** Combined table representing amount of ethylene (Acetylene reduction assay) and PON detection in xenic *Pt15* in nitrate deplete condition.

**Supplementary Table 2.** Details of taxonomy for bacterial metagenomics data in nitrate deplete and nitrate replete conditions (replicates).

**Supplementary Table 3.** MAG features and species-specific plasmid detection from *Pt15* meta-genomic data.

**Supplementary Table 4.** Gene annotation using anvio_COG20, anvio_KEGG and anvio_Prokka of the metagenomics data in nitrate deplete and replete conditions (replicates).

**Supplementary Table 5.** Details ofMicroalgae collection screened in nitrate deplete condition and bacteria isolated from specific microalgae.

**Supplementary Table 6.** List of primers used in the study.

**Supplementary Table 7.** Features of the genomes selected from Mircoscope for phylogenetic studies.
