# Supplementary material for: Combined in vivo and in situ genome-resolved metagenomics reveals novel symbiotic nitrogen fixing interactions between non-cyanobacterial diazotrophs and microalgae
Source: Research Square preprint supplement (doi:10.21203/rs.3.rs-2361194/v1), 2023-01-12
Supplement: Supplementary file 4 [file eab11e985b360bb1812409b0.xlsx]

## Sheet: 5-1 other screened microalge
Microalage collection screened in Nitrate-deplete condition
Accession number	Genus	Species	Sampling site	Sampling date
RCC7043	Rhizosolenia	setigera	Coastel marine water, Roscoff	2019-07-08
NCC365	Opephora	sp K	Atlantic, Baie de Bourgneuf, Lyarne (44)	2010-09-09
NCC183	Achnanthes	brevipes	Atlantic - Ile de Noirmoutier, Claire Penisson (85)	2006-04-14
NCC360.2	Biremis	lucens - clone K3	Atlantic, Baie de Bourgneuf, Lyarne (44)	2010-09-09
NCC366	Opephora	sp N	Atlantic, Baie de Bourgneuf, Lyarne (44)	2010-09-09
NCC182	Staurosira	sp06 cf elliptica	Atlantic, Etier du Pouliguen (44)	2006-03-29
NCC303	Fallacia	sp G1	Noth Atlantic- Groenland, Sermiligâq fjord	2008-08-01
NCC133	Conticriba	weissflogii	Maroc/Estuaire de l'Oum R'bia/Azemmour	2004-10-06
UTCC58	Halamphora	coffeaeformis	Pacific, Victoria, British Columbia (Canada)	1905-06-05
NCC39	Nitzschia	laevis	Atlantic, Baie de Bourgneuf (85)	1999-09-01
NCC18.2.1	Entomoneis	paludosa	Atlantic, Bouin
RCC655	Rhodella	maculata	uknown
RCC178	Tisochrysis	lutea	Caen collection
NCC169	Amphora	sp05	Atlantic, Piriac/Mer	2005-10-17

## Sheet: 5-2 Bacteria - otherMicroalgae
Bacteria isolated from microalage surving in nitrate-deplete condition
Microalgae	Accession number	Class	Genus/Species identified using 16S	nifH-PCR validation	Growth in NFM
Tisochrysis lutea	RCC178	Prymnesiophyceae	Stappia sp.	Yes	Yes
Tisochrysis lutea	RCC178	Prymnesiophyceae	Rhodococcus qingshengii [1]*	No	Yes
Entomoneis paludosa	NCC18.2.1	Bacillariophyceae	Thalassospira [2]*	No	Yes
Opephora sp	NCC366	Bacillariophyceae	Thalassospira [2]*	No	Yes
Opephora sp	NCC366	Bacillariophyceae	Stenotrophomonas maltophilia	Yes	Yes
Rhodella maculata	RCC655	Rhodellophyceae	Uncultured microorganism clone SGGSWU27/ Rhizobium [3]*	No	Yes
*Nitrogen fixation evidence from literature
[1] Joshi, D., Chandra, R., Suyal, D. C., Kumar, S. & Goel, R. Impact of bioinoculants Pseudomonas jesenii MP1 and Rhodococcus qingshengii S10107 on Cicer arietinum yield and soil nitrogen status. Pedosphere 29, 388–399, https://doi.org/10.1016/S1002-0160(19)60807-6 (2019).
[2] Baldani et al., The prokaryotes. DOI: 10.1007/978-3-642-30197-1_300
[3] John Postgate, Rhizobium as a free-living nitrogen fixer. Nature volume 256, page 363 (1975)

## Sheet: 5-3 ARA
Acetylene reduction assay : Ethylene detected representing nitrogenase activity (nmol/L/day)
Sample(s)				% area of ethylene	Area [pA*s]	For 500 ul vol injected	peak area of standard ethylene (b, y=mx+c)	x	y	z	N	nitrogen moles detected (nmol/L/day)
Microalgae	Accession number	Class	Genus/Species identified using 16S
Entomoneis paludosa	NCC18.2.1	Bacillariophyceae	Thalassospira	0.067011	1.21191	2	8324	1.95126e-05	1.95126e-06	87.1097	1.45183	0.483943
Opephora sp	NCC366	Bacillariophyceae	Thalassospira	0.06701	1.29677	2	8324	2.08786e-05	2.08786e-06	93.2078	1.55346	0.517821
Rhodella maculata	RCC655	Rhodellophyceae	Uncultured microorganism clone SGGSWU27/ Rhizobium	0.067	1.40855	2	8324	2.26749e-05	2.26749e-06	101.227	1.68712	0.562373
Tisochrysis lutea	RCC178	Prymnesiophyceae	Rhodococcus qingshengii [1]*	0.067009	1.4798	2	8324	2.38251e-05	2.38251e-06	106.362	1.7727	0.5909
x (%),	Amount of ethylene in 1 ml
y (L)	Total ethylene formation
z (nmol)	Total ethylene formation (nmol)
N (nmol/ L / day)	Nitrogenase activity
Volume of culture	20 ml
Volume of flask	100 ml
Incubation time	3 days
